# Supplementary material
Source: PubMed Central journal article supplement (PMC4468526)
Supplement: IAI.00201-15_zii999091309so1.pdf [file IAI.00201-15_zii999091309so1.pdf]

Supplementary Figure 1

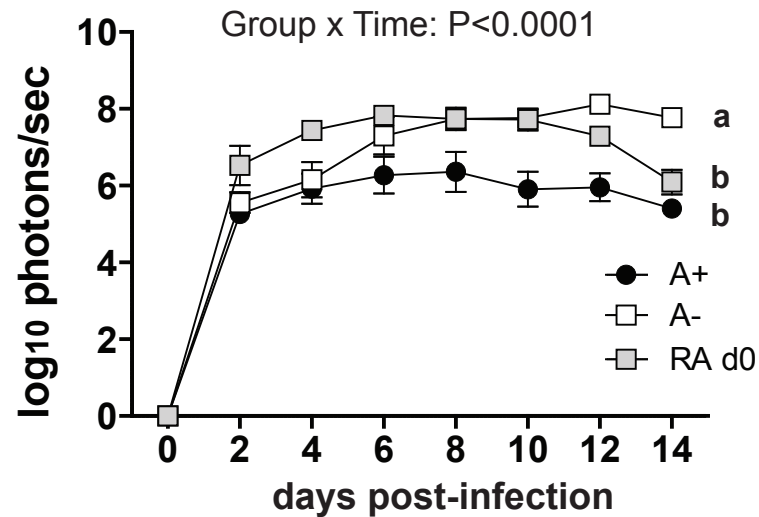

**Supplementary Figure 1: Quantification of whole body imaging during *C. rodentium* infection**

Quantification of bioluminescence from whole body imaging of A+ A-, and RA d0 imaged at d2-14 post-infection. Data is representative from one set of images with  $n=3-4$ /treatment group. Two way ANOVA with Bonferroni post-hoc tests, data marked by "a" is significantly different from data marked by "b" with a P values of  $P < 0.001$ .

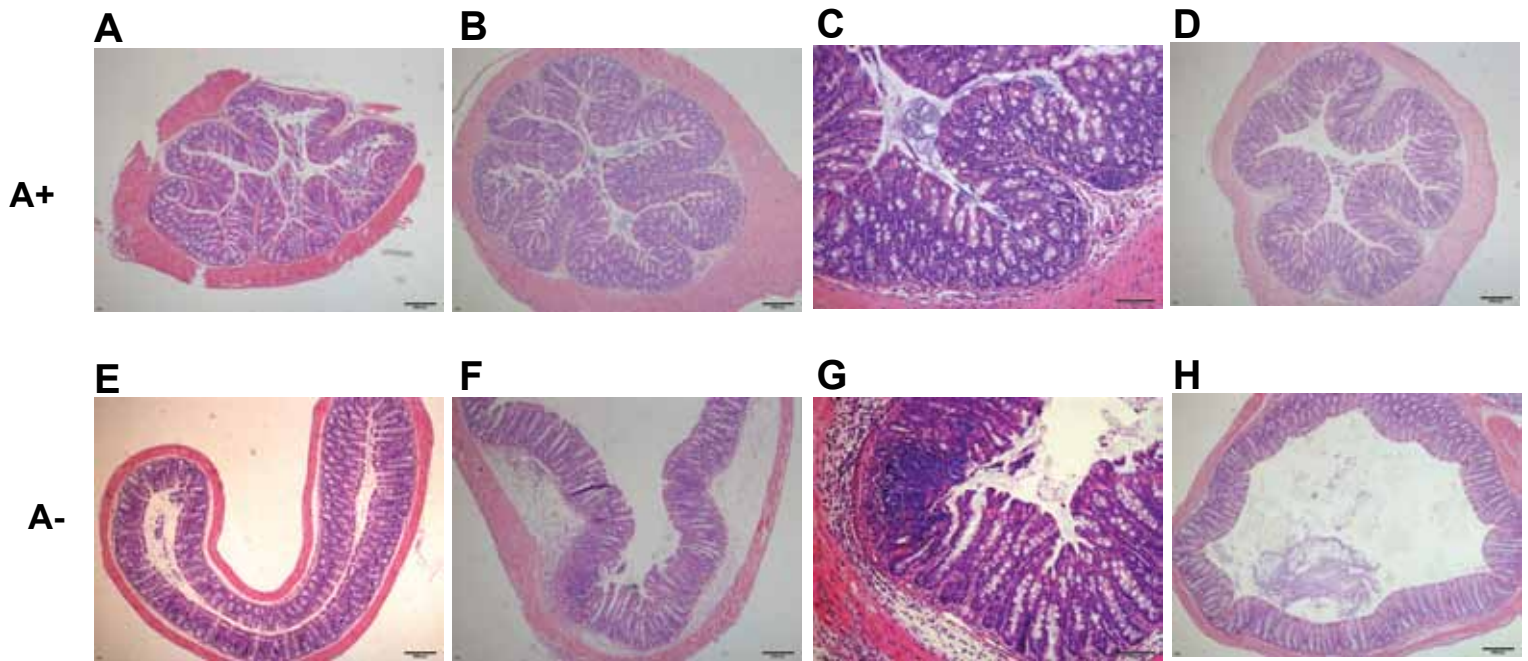

**Supplementary Figure 2: Colon Histology from *C. rodentium* infected animals.** Representative H&E stained distal colon sections from A + mice (A-D) and A- mice (E-H). A+ mice: A) d0, score of 4; B) d10, score of 5; C) Magnification of d10; D) d37, score of 3; A- mice: E) d0, score of 5; F) d10, score of 9; G) Magnification of d10; H) d37 (score of 3). Lines for scale = 200um for A, B, D-F, and H. Lines for scale = 100um for C and G. Photographs were taken with an Olympus BX61 camera.

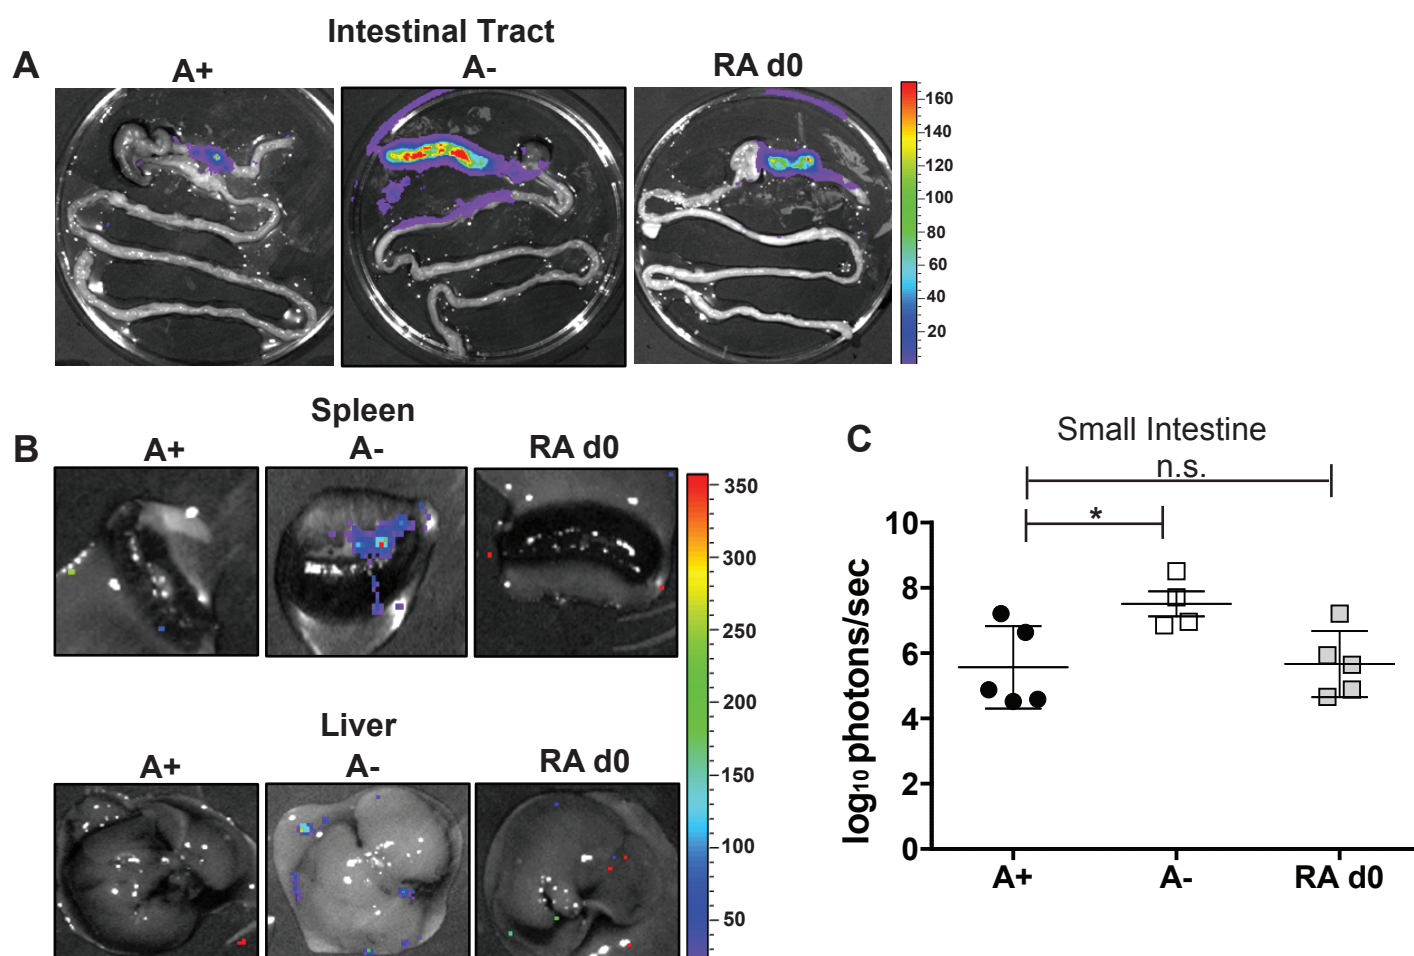

**Supplementary Figure 3: Systemic *C. rodentium* in tissues.** Images of (A) GI tract and (B) spleen and liver. (C) Quantification of bioluminescence from the small intestine. One way ANOVA with Tukey post-hoc tests, \*  $P < 0.05$ . n.s. - not significant.
